# Supplementary material
Source: PubMed Central journal article supplement (PMC6897299)
Supplement: NIHMS1060940-supplement-Supplemental_material_2.pdf [file NIHMS1060940-supplement-Supplemental_material_2.pdf]

| Reference                                                                                                                                                                                                                                                                                                                                                                                                                                                                                                                                                                                                                                              | Topic Classification  | Geographic Region | Setting                                                                             | Design                                 | Justification of RCT (and example of text if applicable)                                                                                                                                                                                                                         | Level of Inference for Primary Outcome | Sample size estimate accounts for clustering | ICC or CV reported? (value-if available) | # of Clusters | Consent                                                                               | Intervention(s)                                                                                                                                                                                     | Outcome(s)                                                                                                                                                                                                                                         | Matching and/or Stratification                                                                                                                                       | Effort to minimize bias and/or contamination                                                                                                                                                | Analyses adjusted for clustering                                                                                                                            |
|--------------------------------------------------------------------------------------------------------------------------------------------------------------------------------------------------------------------------------------------------------------------------------------------------------------------------------------------------------------------------------------------------------------------------------------------------------------------------------------------------------------------------------------------------------------------------------------------------------------------------------------------------------|-----------------------|-------------------|-------------------------------------------------------------------------------------|----------------------------------------|----------------------------------------------------------------------------------------------------------------------------------------------------------------------------------------------------------------------------------------------------------------------------------|----------------------------------------|----------------------------------------------|------------------------------------------|---------------|---------------------------------------------------------------------------------------|-----------------------------------------------------------------------------------------------------------------------------------------------------------------------------------------------------|----------------------------------------------------------------------------------------------------------------------------------------------------------------------------------------------------------------------------------------------------|----------------------------------------------------------------------------------------------------------------------------------------------------------------------|---------------------------------------------------------------------------------------------------------------------------------------------------------------------------------------------|-------------------------------------------------------------------------------------------------------------------------------------------------------------|
| Anderson O, Hanna GB. Effectiveness of the CareCentre at improving contact precautions: randomized simulation and clinical evaluations. <i>Journal of Hospital Infection</i> . 92(4):332-6, 2016 Apr.                                                                                                                                                                                                                                                                                                                                                                                                                                                  | HAI                   | Europe            | 9 acute medical and surgical wards with at least two 4-6 bedded rooms in London, UK | Cluster RCT with cross-over            | Yes                                                                                                                                                                                                                                                                              | Individual level                       | No                                           | No                                       | 9             | Unknown                                                                               | 1. Intervention rooms had several Care Center(end-of-hospital-bed table incorporating a writing surface, patient charts, alcohol-based hand rub, aprons, gloves, medication lockers, and waste bin) | Primary: Hand hygiene ( number of opportunities with any attempt to disinfect hands regardless of technique/number of opportunities for hand hygiene). Secondary: Donning and disposing gloves and aprons.                                         | None                                                                                                                                                                 | No wash out period was used, but they randomized the sequence of conditions.                                                                                                                | No                                                                                                                                                          |
| Baldwin NS, Gilpin DF, Tunney MM, Kearney MP, Cymbile L, Cardwell C, Hughes CM. Cluster randomised controlled trial of an infection control education and training intervention programme focusing on methicillin-resistant <i>Staphylococcus aureus</i> in nursing homes for older people. <i>Journal of Hospital Infection</i> 2011;76:36-41.                                                                                                                                                                                                                                                                                                        | antibiotic resistance | Europe            | 32 nursing homes in Northern Ireland                                                | Matched cluster RCT                    | No                                                                                                                                                                                                                                                                               | Individual level                       | Yes                                          | Yes (0.01)                               | 32            | Written informed consent was obtained from residents (or their next of kin) and staff | infection control education and training programme                                                                                                                                                  | Primary: MRSA prevalence in residents and staff. Secondary: A change in infection control audit scores.                                                                                                                                            | Nursing homes were matched and paired using baseline data related to the number of beds, staffing levels, infection control audit scores, and MRSA prevalence levels | A blinded infection control practitioner carried out infection control audits as validation of the audits performed by the researcher                                                       | Yes: Random effects meta-analysis models to calculate pooled relative risks and p values accounting for clustering within homes.                            |
| Blazewski C, Wallet F, Rouze A, Le Guern R, Ponthieux S, Salleron J, Nseir S. Efficiency of hydrogen peroxide in improving disinfection of ICU rooms. <i>Critical Care (London, England)</i> . 19:30, 2015 Feb 02.                                                                                                                                                                                                                                                                                                                                                                                                                                     | Environment           | Europe            | France (University Hospital of Lille, 5 medical and surgical ICUs)                  | Cluster RCT with cross-over            | No                                                                                                                                                                                                                                                                               | Individual level                       | No                                           | No                                       | 5             | No informed consent was required due to the non-interventional design of the study    | 1. Hydrogen peroxide (H2O2) disinfection (either with H2O2 aerosolization(aHP) or H2O2 vaporization (HPV)                                                                                           | Primary: efficiency of H2O2 in reducing the percentage of ICU rooms contaminated with MDRO. Secondary: compare H2O2 methods in reducing the percentage of MDRO and to compare the residual concentration of H2O2.                                  | None                                                                                                                                                                 | No washout periods, but the order of HPV and aHP in different units were randomized                                                                                                         | No                                                                                                                                                          |
| Bleasdale SC, Trick WE, Gonzalez IM, Lyles RD, Hayden MK, Weinstein RA. Effectiveness of chlorhexidine bathing to reduce catheter-associated bloodstream infections in medical intensive care unit patients. <i>Archives of Internal Medicine</i> . 167(19):2073-9, 2007 Oct 22.                                                                                                                                                                                                                                                                                                                                                                       | HAI                   | North America     | MCU (with 2 separate units) at one hospital in the United States                    | Cluster RCT with cross-over            | Yes "we studied parallel units rather than randomly assigning the intervention at the patient level because a unit-level intervention likely would be more generalizable...and the effect at the group level may reduce risk of intra-unit spread of pathogens between patients" | Individual level                       | No                                           | No                                       | 2             | Waived consent                                                                        | 2% CHG clothes vs. soap and water                                                                                                                                                                   | Primary: incidence of primary BS and incidence of clinical (culture-neg) sepsis; Secondary: incidence of other infections                                                                                                                          | None                                                                                                                                                                 | Two-week wash-out period                                                                                                                                                                    | Yes: Included an interaction term for unit and intervention arm                                                                                             |
| Chami K, Gavazzi G, Bar-Hen A, Carrat F, de Wazieres B, Lepune B, Armand N, Ranfay M, Hajjar J, Piets F, Rothan Tondour M. A short-term, multicomponent infection control program in nursing homes: a cluster randomized controlled trial. <i>Journal of the American Medical Directors Association</i> . 13(6):569.e9-17, 2012 Jul.                                                                                                                                                                                                                                                                                                                   | HAI                   | Europe            | 47 nursing homes in France                                                          | Stratified cluster RCT                 | No                                                                                                                                                                                                                                                                               | Both                                   | Yes                                          | Yes (0.04)                               | 47            | Directors or local stakeholders of participating nursing homes signed an agreement    | implementation of a bundle of infection prevention measures (education, posters, hand hygiene campaigns, surveys)                                                                                   | Primary: Total infection rate (urinary, respiratory, gastro)                                                                                                                                                                                       | Proportionate stratified random sampling (6 strata) to allow equal representation by region and to control for patient characteristics at baseline                   | None                                                                                                                                                                                        | Yes: GEE "to analyze differences at the individual level, with the covariance structure appropriately adjusted for variability between and within clusters" |
| Climo MW, Yokoe DS, Warren DK, Perit TM, Bolon M, Herwaldt LA, Weinstein RA, Sepkowitz KA, Jernigan JA, Sanogo K, Wong ES. Effect of daily chlorhexidine bathing on hospital-acquired infection. <i>New England Journal of Medicine</i> . 2013 Feb 7;368(6):533-42.                                                                                                                                                                                                                                                                                                                                                                                    | HAI                   | North America     | Nine intensive care units in six hospitals                                          | Stratified cluster RCT with cross-over | No                                                                                                                                                                                                                                                                               | Cluster level                          | No                                           | No                                       | 9             | Waived consent                                                                        | Chlorhexidine bathing                                                                                                                                                                               | MRSA or vire acquisition and hospital-acquired bacteremia (two separate outcomes)                                                                                                                                                                  | Stratified by type of ICU and facility                                                                                                                               | Randomization was stratified by unit type. Adjusted for colonization pressure in the unit type. But there was also no washout period and there were multiple units within the same hospital | No                                                                                                                                                          |
| de Smet AM, Kluytmans JA, Blok HE, et al. Selective digestive tract decontamination and selective oropharyngeal decontamination and antibiotic resistance in patients in intensive-care units: an open-label, clustered group randomised, crossover study. <i>Lancet Infect Dis</i> 2011;11:372-380.                                                                                                                                                                                                                                                                                                                                                   | antibiotic resistance | Europe            | Netherlands (13 ICUs, multihospital)                                                | Cluster RCT with cross-over            | Yes                                                                                                                                                                                                                                                                              | Cluster level                          | No                                           | No                                       | 13            | Waived consent                                                                        | 1. Selective digestive tract decontamination (SDD), selective oropharyngeal decontamination (SOD)                                                                                                   | Primary: rates of acquisition of bacteremia and respiratory tract colonization in ICU. Secondary: rate reduction, absolute risk reduction and numbers needed to treat.                                                                             | None                                                                                                                                                                 | Order of regimens were randomly assigned. Person in charge of randomization blinded to ICU identity. The study periods were preceded by wash-in and/or washout month.                       | No                                                                                                                                                          |
| de Smet AM, Kluytmans JA, Cooper BS, Mascini EM, Benus RF, van der Werf TS, van der Hoeven JG, Pickkers P, Bogaers-Holman D, van der Meer NJ, Bernards AT, Kuijper EJ, Joore IC, Leeversteijn-van Hall MA, Bindels AJ, Jansen AR, Wesseling RM, de Jongh BM, Dennesen PJ, van Asselt GJ, te Velde LF, Frenay IH, Kaasjager K, Bosch FH, van Iterson M, Thijsen SF, Kluge GH, Pauw W, de Vries JW, Kaan JA, Arends JP, Aarts LP, Sturm PD, Harinck H, Voss A, Uijtendaal EV, Blok HE, Thiemse Groen ES, Foua MC, Kalkman CJ, Bonten MJ. Decontamination of the digestive tract and oropharynx in ICU patients. <i>N Engl J Med</i> 2009, 360:20-31 [1]. | antibiotic resistance | Europe            | Netherlands (13 ICUs, multihospital)                                                | Cluster RCT with cross-over            | Yes                                                                                                                                                                                                                                                                              | Individual level                       | No                                           | No                                       | 13            | Waived consent                                                                        | 1. Selective digestive tract decontamination (SDD), selective oropharyngeal decontamination (SOD)                                                                                                   | Primary: crude mortality at day 28. Secondary: in-hospital mortality, prevalence of antibiotic resistance, duration of mechanical ventilation, ICU stay, and hospital stay for surviving patients.                                                 | None                                                                                                                                                                 | Order of regimens were randomly assigned. Person in charge of randomization blinded to ICU identity. The study periods were preceded by wash-in and/or washout month.                       | Yes: Random-effects logistic regression model                                                                                                               |
| Derde LP, Cooper BS, Goossens H, Malhotra-Kumar S, Williams RJ, Gniadkowski M, Hryniewicz W, Empel J, Dautzenberg MJ, Annane D, Aragão I. Interventions to reduce colonisation and transmission of antimicrobial-resistant bacteria in intensive care units: an interrupted time series study and cluster randomised trial. <i>The Lancet Infectious Diseases</i> . 2014 Jan 31;14(1):31-9.                                                                                                                                                                                                                                                            | antibiotic resistance | Europe            | 13 ICUs across Europe                                                               | Parallel cluster RCT                   | No                                                                                                                                                                                                                                                                               | Individual level                       | Yes                                          | Yes (0.05)                               | 13            | Waived consent                                                                        | Rapid screening (PCR for MRSA and VRE and chromogenic for highly resistant enterobacteriaceae (HRE))                                                                                                | Primary: acquisition of resistant bacteria (MRSA, VRE or HRE) per 100 patient-days at risk. Secondary: incidence density rate of ICU-acquired colonization and bacteremia, length of stay in ICU, length of stay in the hospital, 28 day mortality | None                                                                                                                                                                 | None                                                                                                                                                                                        | Yes: Multi-level Poisson segmented regression analysis, allowing random variation between ICUs for baseline levels and trends                               |
| Erasmus V, Huis A, Onemina A, van Empelen P, Boog MC, van Beek HX, Polinder S, Steyberg EW, Richardus JH, Vos MC, van Beek EF. The ACCOMPUSH study. A cluster randomised trial on the cost-effectiveness of a multicomponent intervention to improve hand hygiene compliance and reduce healthcare associated infections. <i>BMC Public Health</i> . 11:721, 2011 Sep 24.                                                                                                                                                                                                                                                                              | Hand hygiene          | Europe            | 1 ICU and 1 surgical unit in 16 hospitals in the Netherlands                        | Parallel cluster RCT                   | No                                                                                                                                                                                                                                                                               | Individual level                       | No                                           | No                                       | 16            | Unknown                                                                               | Implementation of a bundle of hand hygiene interventions (education, training, electronic dispensers, performance feedback)                                                                         | Primary: observed HH compliance rate at baseline, 6, 12 and 18 mo. Secondary: prevalence of HAIs at baseline, 6, 12, 18 mo                                                                                                                         | None                                                                                                                                                                 | None                                                                                                                                                                                        | Yes: mixed linear modeling techniques to compensate for HCWs being clustered within wards                                                                   |

|                                                                                                                                                                                                                                                                                                                                                                                                                                                                                                                                                                         |                        |               |                                                                                                 |                                        |     |                  |     |                            |    |                                                                                                                                       |                                                                                                                                                                                                                                                                                                                                                      |                                                                                                                                                                                                                                                                                                                            |                                                                                                                                                     |                                                                                                                                                                                                                                                            |                                                                                                                                                                                                                                  |
|-------------------------------------------------------------------------------------------------------------------------------------------------------------------------------------------------------------------------------------------------------------------------------------------------------------------------------------------------------------------------------------------------------------------------------------------------------------------------------------------------------------------------------------------------------------------------|------------------------|---------------|-------------------------------------------------------------------------------------------------|----------------------------------------|-----|------------------|-----|----------------------------|----|---------------------------------------------------------------------------------------------------------------------------------------|------------------------------------------------------------------------------------------------------------------------------------------------------------------------------------------------------------------------------------------------------------------------------------------------------------------------------------------------------|----------------------------------------------------------------------------------------------------------------------------------------------------------------------------------------------------------------------------------------------------------------------------------------------------------------------------|-----------------------------------------------------------------------------------------------------------------------------------------------------|------------------------------------------------------------------------------------------------------------------------------------------------------------------------------------------------------------------------------------------------------------|----------------------------------------------------------------------------------------------------------------------------------------------------------------------------------------------------------------------------------|
| Fuller C, Michie S, Savage J, McAteer J, Besser S, Charlett A, Hayward A, Cookson BD, Cooper BS, Duckworth G, Jeanes A, Roberts J, Teare L, Stone S. The Feedback Intervention Trial (FIT)—improving hand-hygiene compliance in UK healthcare workers: a stepped wedge cluster randomized controlled trial. PLoS ONE [Electronic Resource]. 7(10):e41617, 2012.                                                                                                                                                                                                         | Hand hygiene           | Europe        | 16 English/Welsh Hospitals (44 acute care of the elderly or general medicine wards and 16 ICUs) | Cluster RCT with stepped-wedge         | Yes | Individual level | Yes | No                         | 16 | Ward managers, IC nurses, ward coordinators gave written consent                                                                      | 1. Behaviourally designed feedback intervention for hand hygiene compliance ( bedside placement of alcohol hand-rub, posters, and patient empowerment materials encouraging HCWs to watch their hands, plus audit and feedback at least once every 6 months)                                                                                         | Primary: Hand Hygiene compliance                                                                                                                                                                                                                                                                                           | None                                                                                                                                                | Allocation of each hospital was concealed for the rest of the hospitals. Ward coordinators were asked to fill out a form to record observations, feedback, goals, and action plans each time an observation/feedback took place (fidelity of intervention) | Yes; Mixed-effects logistic regression, allowing for dependencies of observations made within hospitals and wards.                                                                                                               |
| Gerber JS, Prasad PA, Fiks AG, Localio AR, Grundmeier RW, Bell LM, Wasserman RC, Keren R, Zaoutis TE. Effect of an outpatient antimicrobial stewardship intervention on broad-spectrum antibiotic prescribing by primary care pediatricians: a randomized trial. JAMA. 309(22):2345-52, 2013 Jun 12.                                                                                                                                                                                                                                                                    | antibiotic stewardship | North America | Network of pediatric primary care practices in Pennsylvania and New Jersey, USA                 | Stratified cluster RCT                 | Yes | Individual level | Yes | No                         | 18 | A representative of each practice consented                                                                                           | One 1-hour on site clinician education session followed by 1 year of personalized, quarterly audit and feedback of prescribing for bacterial and viral ARTI                                                                                                                                                                                          | Primary: Rates of broad-spectrum (off-guideline) antibiotic prescribing for bacterial acute respiratory tract infections (ARTIs) and antibiotics for viral ARTIs for 1 year after intervention                                                                                                                             | Practices stratified by location and volume                                                                                                         | None                                                                                                                                                                                                                                                       | Yes; Sandwich estimators                                                                                                                                                                                                         |
| Gopal Rao G, Jeanes A, Russell H, Wilson D, Atere-Roberts E, O'Sullivan D, Donaldson N. Effectiveness of short-term, enhanced, infection control support in improving compliance with infection control guidelines and practice in nursing homes: a cluster randomized trial. Epidemiology & Infection. 137(10):1465-71, 2009 Oct.                                                                                                                                                                                                                                      | HAI                    | Europe        | 12 nursing homes in London, UK                                                                  | Matched cluster RCT                    | Yes | Cluster level    | No  | No                         | 12 | Unknown                                                                                                                               | Enhanced infection control support (additional staff and training)                                                                                                                                                                                                                                                                                   | Proportion of compliance with infection control guidelines as measured by an audit tool                                                                                                                                                                                                                                    | Matched pair randomization by number of residents in the facility                                                                                   | None                                                                                                                                                                                                                                                       | No                                                                                                                                                                                                                               |
| Harris AD, Pinesles I, Belton B, Johnson JK, Shardell M, Loeb M, Newhouse R, Demby L, Braun B, Perencevich EN, Hall KK, Morgan DJ, Benefits of Universal Glove and Gown (BUGG) Investigators, Shahyar SK, Price CS, Gadbaw JJ, Drees M, Kett DH, Munoz-Price LS, Jacob JT, Herwaldt LA, Sullis CA, Yokoe DS, Maragakis L, Lissauer ME, Zervos MJ, Warren DK, Carver RL, Anderson DJ, Calfee DP, Bowling JE, Safdar N. Universal glove and gown use and acquisition of antibiotic-resistant bacteria in the ICU: a randomized trial. JAMA. 310(15):1571-80, 2013 Oct 16. | antibiotic resistance  | North America | 20 ICUs across the US                                                                           | Matched cluster RCT                    | Yes | Cluster level    | Yes | Yes (0.38)                 | 20 | Waived consent                                                                                                                        | HCWs were required to wear gloves and gowns for all patient contact and when entering any patient room.                                                                                                                                                                                                                                              | Primary: Acquisition of MRSA or VRE as a composite. Secondary: Acquisition of MRSA and VRE as separate outcomes. Other: healthcare associated infections at the cluster level, adverse events, frequency of HCW room entry and hand compliance                                                                             | ICUs were paired matched based on baseline MRSA or VRE acquisition rates                                                                            | 1. Matched pair was randomized to the intervention or control group. 2. Each site had a study coordinator and physician champion to lead implementation.                                                                                                   | No                                                                                                                                                                                                                               |
| Huang SS, Septimus E, Kleinman K, Moody J, Hickok J, Avery TR, Lankiewicz J, Gombosev A, Terpsira L, Hartford F, Hayden MK, Jernigan JA, Weinstein RA, Fraser VJ, Haffenreffer K, Cui E, Kaganov RE, Lolans K, Perlin JB, Platt R (2013) Targeted versus universal decolonization to prevent ICU infection. N Engl J Med 368:2255-2265.                                                                                                                                                                                                                                 | HAI                    | North America | 16 states in the US                                                                             | Parallel cluster RCT                   | Yes | Individual level | Yes | Yes                        | 43 | Patient notices about group-specific protocols were posted in each ICU room. The requirement for written informed consent was waived. | 1- MRSA screening and isolation; 2- targeted decolonization (i.e., screening, isolation, and decolonization of MRSA carriers); 3- universal decolonization (i.e., no screening, and decolonization of all patients)                                                                                                                                  | Primary: ICU-attributable, MRSA positive clinical cultures; Secondary: ICU-attributable bloodstream infection caused by MRSA and ICU-attributable bloodstream infection caused by any pathogen                                                                                                                             | Stratification and block randomization for: a) patient volume; b) baseline prevalence of MRSA carriage; c) state mandates for MRSA screening in ICU | Had a 4 month phase-in period                                                                                                                                                                                                                              | Yes; Proportional-hazards models with shared frailties accounted for clustering within hospitals                                                                                                                                 |
| Huang SS, Septimus E, Hayden MK, Kleinman K, Sturtevant J, Avery TR, Moody J, Hickok J, Lankiewicz J, Gombosev A, Kaganov RE, Haffenreffer K, Jernigan JA, Perlin JB, Platt R, Weinstein RA, Agency for Healthcare Research and Quality (AHRQ) DEcIDE Network and Healthcare-Associated Infections Program, and the CDC Prevention Epicenters Program. Effect of body surface decolonization on bacteriuria and candiduria in intensive care units: an analysis of a cluster-randomised trial. The Lancet Infectious Diseases. 16(1):70-9, 2016 Jan.                    | HAI                    | North America | 43 hospitals (74 adult ICUs) in the US                                                          | Parallel cluster RCT                   | No  | Individual level | Yes | Yes                        | 43 | Patient notices about group-specific protocols were posted in each ICU room. The requirement for written informed consent was waived. | 1- MRSA screening and isolation; 2- targeted decolonization (i.e., screening, isolation, and decolonization of MRSA carriers); 3- universal decolonization (i.e., no screening, and decolonization of all patients)                                                                                                                                  | This is actually a secondary analysis of the study above. Outcome for this "sub-study"= 1- high-level bacteriuria (≥50 000 colony forming units [CFU]/mL dueto a bacterial uropathogen); 2-high-level candiduria(≥50 000 CFU/mL); 3-any bacteriuria due to a bacterial uropathogen per 1000 ICU-attributable patient days. | Stratification and block randomization for: a) patient volume; b) baseline prevalence of MRSA carriage; c) state mandates for MRSA screening in ICU | Had a 4 month phase-in period                                                                                                                                                                                                                              | Yes; Proportional-hazards models with shared frailties accounted for clustering within hospitals (Shared frailties are similar to random intercept in mixed effects model and allow each hospital to have unique infection rate) |
| Huis A, Schoonhoven L, Grol R, Borm G, Adang E, Hulscher M, et al. Helping hands: A cluster randomised trial to evaluate the effectiveness of two different strategies for promoting hand hygiene in hospital nurses. Implement Sci 2011, 6:101.                                                                                                                                                                                                                                                                                                                        | Hand hygiene           | Europe        | 3 hospitals with 60 wards in the Netherlands                                                    | Stratified cluster RCT                 | Yes | Individual level | Yes | Yes (ward=0.05, nurse=0.6) | 60 | Unknown (but an exempt study)                                                                                                         | State-of-the-art strategy (education, reminders, feedback, and targeting adequate products and facilities) vs Extended strategy (plus active commitment and initiative of ward management, modelling of informal leaders at the ward, setting norms and targets within the team.                                                                     | Primary: Hand hygiene compliance. Secondary: team climate, costs and health effects.                                                                                                                                                                                                                                       | Wards stratified by type of ward (surgical, internal medicine, ICUs, pediatric)                                                                     | To reduce Hawthorne effect unobtrusive observation were taken                                                                                                                                                                                              | Yes; Mixed-linear modeling considering ward random effects and HCW random effects                                                                                                                                                |
| Huskins WC, Huckabee CM, O'Grady NP, Murray P, Kopetskie H, Zimmer L, Walker ME, Sinkowitz-Cochran RL, Jernigan JA, Samore M, Wallace D, Goldmann DA; STAR*ICU Trial Investigators. Intervention to reduce transmission of resistant bacteria in intensive care. New England Journal of Medicine. 364(15):1407-18, 2011 Apr 14.                                                                                                                                                                                                                                         | antibiotic resistance  | North America | 18 ICUs at several hospitals in the US                                                          | Stratified cluster RCT                 | No  | Cluster level    | No  | No                         | 18 | Waived consent                                                                                                                        | Expanded use of barrier precautions:isolation at time of admission (if infected or colonized with MRSA or VRE the previous year and at any time during the ICU stay) and continue for the entire ICU stay. All other patients were assigned to universal gloving until their discharge or until the results of surveillance cultures were negative). | Primary: ICU-level incidence of new events of colonization or infection with MRSA or VRE per 1000 ICU patient days at risk. Secondary: incidences of colonization or infection with MRSA and VRE and process measures                                                                                                      | Stratified by ICU type and baseline incidence of MRSA and VRE                                                                                       | Monitors in all patient rooms                                                                                                                                                                                                                              | No                                                                                                                                                                                                                               |
| Jernigan JA, Slegman-Igra Y, Guerrant RC, Farr BM. A randomized crossover study of disposable thermometers for prevention of Clostridium difficile and other nosocomial infections. Infection Control & Hospital Epidemiology. 19(7):494-9, 1998 Jul.                                                                                                                                                                                                                                                                                                                   | HAI                    | North America | 1 hospital in the United States                                                                 | Stratified cluster RCT with cross-over | No  | Individual level | No  | No                         | 20 | Unknown                                                                                                                               | Single use disposable thermometers vs. electronic thermometers                                                                                                                                                                                                                                                                                       | Outcomes: 1- Rates of CDI, 2- Total nosocomial diarrheal episodes, 3- Total nosocomial infections                                                                                                                                                                                                                          | Stratified randomization according to previous CDI rates                                                                                            | Cross-over (but no wash-out period)                                                                                                                                                                                                                        | No                                                                                                                                                                                                                               |

|                                                                                                                                                                                                                                                                                                                                                    |                        |               |                                                                             |                                                  |                                                                                                                                                                                                                                                                                                   |                  |     |                          |    |                                                                                 |                                                                                                                                                                                                                                                      |                                                                                                                                                                                                                                                                                                      |                                                                                                        |                                                                                                                                               |                                                                                                                                                                                                                                                                                                                                              |
|----------------------------------------------------------------------------------------------------------------------------------------------------------------------------------------------------------------------------------------------------------------------------------------------------------------------------------------------------|------------------------|---------------|-----------------------------------------------------------------------------|--------------------------------------------------|---------------------------------------------------------------------------------------------------------------------------------------------------------------------------------------------------------------------------------------------------------------------------------------------------|------------------|-----|--------------------------|----|---------------------------------------------------------------------------------|------------------------------------------------------------------------------------------------------------------------------------------------------------------------------------------------------------------------------------------------------|------------------------------------------------------------------------------------------------------------------------------------------------------------------------------------------------------------------------------------------------------------------------------------------------------|--------------------------------------------------------------------------------------------------------|-----------------------------------------------------------------------------------------------------------------------------------------------|----------------------------------------------------------------------------------------------------------------------------------------------------------------------------------------------------------------------------------------------------------------------------------------------------------------------------------------------|
| Jeyaratham D; Whitty CJ; Phillips K; Liu D; Orezci C; Ajoku U; French GL. Impact of rapid screening tests on acquisition of methicillin resistant Staphylococcus aureus: cluster randomised crossover trial. <i>BMJ</i> . 335(7650):927-30, 2008 Apr 26.                                                                                           | HAI                    | Europe        | 1 hospital in the UK                                                        | Cluster RCT with cross-over                      | No                                                                                                                                                                                                                                                                                                | Individual level | Yes | No                       | 10 | Verbal consent from individual patients                                         | Rapid PCR based on screening test for MRSA vs. conventional culture                                                                                                                                                                                  | MRSA acquisition                                                                                                                                                                                                                                                                                     | None                                                                                                   | Wash-out period prior to cross-over                                                                                                           | Yes; GEE with logit link for acquisition rate taking into account the clustered design                                                                                                                                                                                                                                                       |
| Jongerden IP; Buiting AG; Levenstein-van Hall MA; Speelberg B; Zeidler S; Kesecioglu J; Bonten MJ. Effect of open and closed endotracheal suctioning on cross-transmission with Gram-negative bacteria: a prospective crossover study. <i>Critical Care Medicine</i> . 2011 Jun;39(6):1313-21.                                                     | antibiotic resistance  | Europe        | 4 ICUs from 2 hospitals in The Netherlands                                  | Cluster RCT with cross-over                      | Yes                                                                                                                                                                                                                                                                                               | Individual level | No  | No                       | 4  | Waived consent and all patients were informed about study aims and consequences | Closed suctioning systems vs. open suctioning systems for patients requiring mechanical ventilation                                                                                                                                                  | Primary: cross-transmission of pseudomonas, acinetobacter or enterobacter; Secondary: acquisition rates of colonization                                                                                                                                                                              | None                                                                                                   | Two week phase in period and 4 week washout/washin period between cross-over                                                                  | No                                                                                                                                                                                                                                                                                                                                           |
| Lee SK; Aziz K; Singhal N; Cronin CM; James A; Lee DS; Matthew D; Ohlsson A; Sankaran K; Sethia M; Synnes A; Walker R; Whyte R; Langley J; MacNab YC; Stevens B; von Dadelszen P. Improving the quality of care for infants: a cluster randomized controlled trial. <i>CMAJ Canadian Medical Association Journal</i> . 181(8):469-76, 2009 Oct 13. | HAI                    | North America | 12 NICUs at 12 hospitals in Canada                                          | Parallel cluster RCT                             | No                                                                                                                                                                                                                                                                                                | Individual level | Yes | No                       | 12 | Unknown                                                                         | Implementation of evidence-based practice for improving quality                                                                                                                                                                                      | Outcomes: 1- incidence of nosocomial infections, 2- incidence of bronchopulmonary dysplasia, 3- death and bronchopulmonary dysplasia (composite outcome), 3- several other secondary outcomes                                                                                                        | None                                                                                                   | Had a phase-in period                                                                                                                         | Yes; random-intercept multi-level logistic regression with random hospital-site effects                                                                                                                                                                                                                                                      |
| Loonjans-van den Akker I; van Delden JJ; Verheij TJ; van der Sande MA; van Essen GA; Phiphagen-Dalhusen J, et al. Effects of a multifaceted program to increase influenza vaccine uptake among health care workers in nursing homes: a cluster randomised controlled trial. <i>Vaccine</i> . 2010;28(31):5086-92.                                  | Vaccination            | Europe        | 33 nursing homes in the Netherlands                                         | Stratified cluster RCT                           | No                                                                                                                                                                                                                                                                                                | Cluster level    | Yes | Yes (0.107)              | 33 | Unknown                                                                         | Outreach visits by primary researcher, information meetings and appointment of a physician as local program coordinator                                                                                                                              | Uptake of influenza vaccine among healthcare workers                                                                                                                                                                                                                                                 | Randomization was stratified by number of beds, influenza vaccine uptake in 2005 and geographic region | Clusters are distinct and well separated                                                                                                      | Yes; "To take account of the clustered design we used Generalised Estimated Equation analysis with nursing homes as the clustering variable to analyse data on influenza vaccine uptake." "We analyzed outcomes at the cluster level rather than individual level"                                                                           |
| MacIntyre CR; Seale H; Dung TC; Hien NT; Nga PT; Chughtal AA; Rahman B; Dwyer DE; Wang Q. A cluster randomised trial of cloth masks compared with medical masks in healthcare workers. <i>BMJ Open</i> . 5(4):e006577, 2015 Apr 22.                                                                                                                | Other                  | Asia          | 64 wards in a secondary/tertiary-level hospitals in Hanoi, Vietnam          | Parallel cluster RCT                             | Yes                                                                                                                                                                                                                                                                                               | Individual level | Yes | Yes (0.027)              | 64 | Written informed consent was obtained by HCWs                                   | 1. Medical masks all times on their work shift, 2. cloth masks at all times on their work shift (vs. control/standard of care)                                                                                                                       | Primary: Clinical respiratory illness, influenza-like illness, Lab-confirmed viral respiratory infection                                                                                                                                                                                             | None                                                                                                   | Laboratory results were blinded                                                                                                               | Yes; cluster-adjusted chi-squares, log-binomial model using GEE to account for clustering by ward                                                                                                                                                                                                                                            |
| MacIntyre CR; Wang Q; Seale H; Yang P; Shi W; Gao Z; Rahman B; Zhang Y; Wang X; Newall AT; Heywood A; Dwyer DE. A randomized clinical trial of three options for N95 respirators and medical masks in health workers. <i>American Journal of Respiratory &amp; Critical Care Medicine</i> . 187(9):960-6, 2013 May 01.                             | Other                  | Asia          | 19 tertiary hospitals (68 wards) in Beijing, China                          | Parallel cluster RCT                             | Yes                                                                                                                                                                                                                                                                                               | Individual level | Yes | Yes (0.027)              | 68 | Written informed consent was obtained by HCWs                                   | 1. Medical masks at all times on shift, 2. N95 respirators at all times on shift, 3. targeted (intermittent) use of N95 respirators only while doing high risk procedures or barrier.                                                                | Primary: Clinical respiratory illness, influenza-like illness, Lab-confirmed viral respiratory infection, lab-confirmed influenza, and laboratory confirmed bacterial colonization in symptomatic subjects                                                                                           | None                                                                                                   | None                                                                                                                                          | Yes; cluster-adjusted chi-squares, cluster-correlated robust estimate of variance was used to estimate the standard error of HR                                                                                                                                                                                                              |
| Marsteller JA; Sexton JB; Hsu YJ; Hsiao CJ; Holzmueller CG; Pronovost PJ; Thompson DA. A multicenter, phased, cluster-randomized controlled trial to reduce central line-associated bloodstream infections in intensive care units*. <i>Critical Care Medicine</i> . 40(11):2933-9, 2012 Nov.                                                      | HAI                    | North America | 35 hospitals across 12 states (45 ICUs) in the US                           | Cluster RCT with stepped-wedge                   | Yes                                                                                                                                                                                                                                                                                               | Cluster level    | No  | No                       | 45 | Waived consent                                                                  | 1. Multifaceted intervention based on evidence-based practices: hand-washing before line placement, using full barrier precaution, avoiding line placement at the femoral site, usinf chlorhexidine to cleanse site, and removing unnecessary lines. | Primary: quarterly rate of CLABSIs                                                                                                                                                                                                                                                                   | None                                                                                                   | The analysis was adjusted by hospital system. To reduce Hawthorne effect by not collecting CLASI rates from the control group during phase 1. | Yes; Robust clustering to account for shared variation                                                                                                                                                                                                                                                                                       |
| Melsen WG, De Smet AM, Kluymans JA, Bonten MJ. Selective decontamination of the oral and digestive tract in surgical versus non-surgical patients in intensive care in a cluster-randomized trial. <i>British Journal of Surgery</i> . 2012 Feb 1;99(2):232-7.                                                                                     | antibiotic resistance  | Europe        | Netherlands, 13 ICUs                                                        | Cluster RCT with cross-over                      | No                                                                                                                                                                                                                                                                                                | Individual level | No  | No                       | 13 | Unknown                                                                         | 1. Selective digestive decontamination (SDD), Selective oropharyngeal decontamination (SOD) or standard care                                                                                                                                         | Primary: 28-day mortality rate. Secondary: duration of mechanical ventilation, duration of ICU, hospital length of stay, bacteremias rates.                                                                                                                                                          | None                                                                                                   | None                                                                                                                                          | No; "ICU clustering effects were not taken into account because cluster effects were not found in earlier analysis and would therefore not change the results"                                                                                                                                                                               |
| Mertz D, N D'Almeida, S Walter, K Braill, M Loeb. Effect of a multifaceted intervention on adherence to hand hygiene among healthcare workers: a cluster-randomized trial. <i>Infect Control Hospital Epidemiol</i> 2010;31:1170-1176.                                                                                                             | Hand hygiene           | North America | 30 units in 3 hospitals in Canada                                           | Stratified cluster RCT                           | No                                                                                                                                                                                                                                                                                                | Cluster level    | Yes | Yes (0.05)               | 30 | Unknown                                                                         | Multimodal hand hygiene improvement strategy (education, performance feedback, posters)                                                                                                                                                              | Primary: Adherence with hand hygiene, Secondary: Incidence of hospital-acquired MRSA colonization                                                                                                                                                                                                    | Randomization was stratified by hospital site and type of hospital unit                                | Had a 3 month baseline period                                                                                                                 | No; "The unit of analysis for this study was at the cluster level", used unpaired t-tests and Mann-whitney U tests                                                                                                                                                                                                                           |
| Milstone AM, Eward A, Song X, Zerr DM, Orscheln R, Speck K, Obeng D, Reich NG, Coffin SE, Peri TM (2013) Daily chlorhexidine bathing to reduce bacteraemia in critically ill children: a multicentre, cluster-randomised, crossover trial. <i>Lancet</i> 381:1099-1106.                                                                            | HAI                    | North America | 10 pediatric ICUs in 5 US hospitals                                         | Cluster RCT with cross-over and multiple periods | Yes; "Although relatively underused, especially in children, the cluster-randomised crossover design is a strength of this study. Incorporating a crossover into the design enabled us to estimate the treatment effect by comparing each unit with itself during treatment and control periods." | Individual level | Yes | Yes (design effect =1.2) | 10 | Consented caregivers of neonatal ICU patients                                   | chlorhexidine bathing                                                                                                                                                                                                                                | primary: bacteraemia; main secondary outcome: CLABSIs, additional secondary outcomes: SSI and MRSA and VRE clinical culture rates                                                                                                                                                                    | Stratification at the hospital and ICU level                                                           | Used a short washout period (2 weeks)                                                                                                         | Yes; "... used Poisson regression models to estimate adjusted incidence rate ratios (aIRRs), adjusted for unit, secular trends in infection rates over time, and characteristics of patient admissions. The period effect was not significant in any analyses. We accounted for hospital level clustering with a robust variance estimator." |
| Nijssen S; Fluit A; van de Vijver D; Top J; Willems R; Bonten MJ. Effects of reducing beta-lactam antibiotic pressure on intestinal colonization of antibiotic-resistant gram-negative bacteria. <i>Intensive Care Medicine</i> . 36(3):S12-9, 2010 Mar.                                                                                           | antibiotic stewardship | Europe        | 2 ICUs at 1 hospital in the Netherlands                                     | Cluster RCT with cross-over                      | No                                                                                                                                                                                                                                                                                                | Individual level | No  | No                       | 2  | Waived consent                                                                  | Reduction of B-lactam exposure                                                                                                                                                                                                                       | Primary: acquisition of CRE                                                                                                                                                                                                                                                                          | None                                                                                                   | Eight month baseline period                                                                                                                   | No                                                                                                                                                                                                                                                                                                                                           |
| Noto MJ, Domenico HJ, Byrne DW, Talbot T, Rice TW, Bernard GR, Wheeler AP (2015) Chlorhexidine bathing and health care-associated infections: a randomized clinical trial. <i>JAMA</i> 313:369-378.                                                                                                                                                | HAI                    | North America | United States (5 ICUs in 1 tertiary medical center in Nashville, Tennessee) | Cluster RCT with cross-over                      | Yes                                                                                                                                                                                                                                                                                               | Individual level | No  | No                       | 5  | Unknown                                                                         | Once a day bathing with cloths impregnated with 2% chlorhexidine                                                                                                                                                                                     | Primary: composite of CLABSIs, CAUTIs, VAP, C.diff; Secondary: individual rates of CLABSIs, CAUTIs, VAP, C.diff, in-hospital mortality, hospital and ICU length of stay, rates of clinical cultures positive for MDRO, blood culture contamination, HAIs, and rates of the primary outcomes per ICU. | None                                                                                                   | 1. Two week washout period between intervention and control periods. 2. Multiple crossover periods                                            | No                                                                                                                                                                                                                                                                                                                                           |

|                                                                                                                                                                                                                                                                                                                                                                                                                                                                                                                                                                                                                                                  |                       |               |                                                |                                                  |                                                                                                                                                                        |                  |     |                 |    |                                                                                               |                                                                                                                                                                                                                                                                                                                                                                                                                                                                                                                                                                                                                                                                                                                                                                                                       |                                                                                                                                                                                                                                                                                                                                                                                     |                                                                                                                                                 |                                                                                                                                                                                                                                                                                                              |                                                                                                                                                                                                                                                                                                                                                |
|--------------------------------------------------------------------------------------------------------------------------------------------------------------------------------------------------------------------------------------------------------------------------------------------------------------------------------------------------------------------------------------------------------------------------------------------------------------------------------------------------------------------------------------------------------------------------------------------------------------------------------------------------|-----------------------|---------------|------------------------------------------------|--------------------------------------------------|------------------------------------------------------------------------------------------------------------------------------------------------------------------------|------------------|-----|-----------------|----|-----------------------------------------------------------------------------------------------|-------------------------------------------------------------------------------------------------------------------------------------------------------------------------------------------------------------------------------------------------------------------------------------------------------------------------------------------------------------------------------------------------------------------------------------------------------------------------------------------------------------------------------------------------------------------------------------------------------------------------------------------------------------------------------------------------------------------------------------------------------------------------------------------------------|-------------------------------------------------------------------------------------------------------------------------------------------------------------------------------------------------------------------------------------------------------------------------------------------------------------------------------------------------------------------------------------|-------------------------------------------------------------------------------------------------------------------------------------------------|--------------------------------------------------------------------------------------------------------------------------------------------------------------------------------------------------------------------------------------------------------------------------------------------------------------|------------------------------------------------------------------------------------------------------------------------------------------------------------------------------------------------------------------------------------------------------------------------------------------------------------------------------------------------|
| Oostdijk EA; Kesecioglu J; Schultz MJ; Visser CE; de Jonge E; van Essen EH; Bernards AT; Purmer I; Brimicombe R; Bergmans D; van Tiel F; Bosch FH; Mascini E; van Griethuyzen A; Bindels A; Jansz A; van Stevenick FA; van der Zwet WC; Fijen JW; Thijssen S; de Jong R; Oudier J; Raben A; van der Vorm E; Koeman M; Rothbarth J; Rijkeboer A; Gruteke P; Hart-Sweet H; Peerbooms P; Winsser LJ; van Elsacker-Niele AM; Demmendaal K; Brandenburg A; de Smet AM; Bonten MJ. Effects of decolonization of the oropharynx and intestinal tract on antibiotic resistance in ICUs: a randomized clinical trial. JAMA. 312(14):1429-37, 2014 Oct 08. | antibiotic resistance | Europe        | Netherlands, 16 ICUs                           | Cluster RCT with cross-over                      | No                                                                                                                                                                     | Cluster level    | Yes | Yes (0.01)      | 16 | Waived consent                                                                                | Selective digestive decolonization (SDD) or Selective oropharyngeal decolonization (SOD)                                                                                                                                                                                                                                                                                                                                                                                                                                                                                                                                                                                                                                                                                                              | Primary: Unit-wide prevalence of antibiotic resistant Gram-negative bacteria. Secondary: day-28 mortality, ICU acquired bacteremia, length of stay in the ICU                                                                                                                                                                                                                       | Two strata based on presence or absence of applying selective decolonization in the unit for more than 4 months prior to the start of the study | One month wash-in and wash-out period. To minimize inclusion bias, all patients who received at least 1 dose of SDD or SOD were eligible, as were all patients with an ICU stay of at least 48 hours, irrespective of whether their SDD or SOD. All ICUs were visited at least 7 times to monitor the study. | No                                                                                                                                                                                                                                                                                                                                             |
| Parietti JJ; du Cheyron D; Ramakers M; Malbrunoy B; Leclercq R; Le Coutour X; Charbonneau P; Members of the NACRE Study Group. Alcoholic povidone-iodine to prevent central venous catheter colonization: A randomized unit-crossover study. Critical Care Medicine. 32(3):708-13, 2004 Mar.                                                                                                                                                                                                                                                                                                                                                     | HAI                   | Europe        | 2 units at 1 hospital in France                | Cluster RCT with cross-over                      | No                                                                                                                                                                     | Individual level | No  | No              | 2  | Unknown                                                                                       | Alcoholic povidone iodine vs. aqueous povidone iodine                                                                                                                                                                                                                                                                                                                                                                                                                                                                                                                                                                                                                                                                                                                                                 | 1- Catheter colonization rate, 2- Catheter-related bacteremia, 3- Catheter-related infection                                                                                                                                                                                                                                                                                        | None                                                                                                                                            | Performed a matched case-control within the study                                                                                                                                                                                                                                                            | No                                                                                                                                                                                                                                                                                                                                             |
| Parietti JJ; Thibon P; Heller R; Le Roux Y; von Theobald P; Bensadoun H; Bouvet A; Lemerchand F; Le Coudour X; Antiseptie Chirurgicale des mains Study Group. Hand-rubbing with an aqueous alcoholic solution vs traditional surgical hand-scrubbing and 30-day surgical site infection rates: a randomized equivalence study. [Erratum appears in JAMA 2002 Dec 4;288(21):2689 Note: Bensadoun, Hervé [corrected to Bensadoun, Henri]]. JAMA. 288(6):722-7, 2002 Aug 14.                                                                                                                                                                        | Hand hygiene          | Europe        | 6 surgical services from 4 hospitals in France | Cluster RCT with cross-over and multiple periods | Yes; "In our study, differences in the characteristics of the patients and surgical personnel were minimized by the randomized service cross-over experimental design" | Individual level | No  | No              | 6  | Unknown                                                                                       | Hand rubbing (75% aqueous alcohol solution containing propanol) vs. Hand scrubbing (4% povidone iodine or 4% CHG)                                                                                                                                                                                                                                                                                                                                                                                                                                                                                                                                                                                                                                                                                     | Primary: 30-day SSI rates; Secondary: OR team tolerance and compliance                                                                                                                                                                                                                                                                                                              | None                                                                                                                                            | Multiple periods (switched every month)                                                                                                                                                                                                                                                                      | No                                                                                                                                                                                                                                                                                                                                             |
| Riphagen-Dalhuisen J, Burgerhof JG, Frijstein G, van der Geest-Blankert AD, Danhof-Pont MB, de Jager HJ, et al. Hospital-based cluster randomized controlled trial to assess effects of a multi-faceted programme on influenza vaccine coverage among hospital healthcare workers and nosocomial influenza in the Netherlands, 2009 to 2011. Euro Surveill. 2013;18(26):20512.                                                                                                                                                                                                                                                                   | Vaccination           | Europe        | University medical centers in the Netherlands  | Parallel cluster RCT                             | Yes                                                                                                                                                                    | Cluster level    | Yes | Yes (10%+0.01)  | 6  | Waived consent                                                                                | Intervention Mapping Method based influenza vaccination program                                                                                                                                                                                                                                                                                                                                                                                                                                                                                                                                                                                                                                                                                                                                       | Primary: influenza vaccine uptake among all HCWs at UMC level. Secondary: absenteeism rates among HCWs, laboratory confirmed influenza, pneumonia, length of stay, admittance to ICU and duration.                                                                                                                                                                                  | None                                                                                                                                            | Researcher in charge of randomization was blinded to the identity of the UMCS.                                                                                                                                                                                                                               | Yes: Generalized linear mixed model to account for dependencies of individual observations between hospitals                                                                                                                                                                                                                                   |
| Rodriguez V; Giffure C; Villa S; Almada G; Prasopa-Plazier N; Gogna M; Gibbons J; Garcia Elorrio E; Argentinian Group Hand Hygiene Improvement. A multimodal intervention to improve hand hygiene in ICUs in Buenos Aires, Argentina: a stepped wedge trial. International Journal for Quality in Health Care. 27(5):405-11, 2015 Oct.                                                                                                                                                                                                                                                                                                           | Hand hygiene          | South America | Buenos Aires, Argentina                        | Cluster RCT with stepped-wedge                   | No                                                                                                                                                                     | Individual level | Yes | Yes(0.005-0.03) | 11 | HCWs signed an informed consent before baseline assessment to confirm participation agreement | 1. A signed letter from leaders with the commitment to support the project and the participation of directors in monthly executive walk-rounds were asked from hospital directors and unit leaders fortnightly and then monthly. 2. Availability of alcohol-based hand rub and materials needed to comply with hand hygiene was daily surveyed and re-supplied. 3. Reminders placed at the entrance of patient's rooms and in common areas. 4. A storyboard was used to display the letter signed by directors, results of monthly observations and photos of the healthcare team. 5. Every month, coordinators of intervened sites received results of the indicator and they showed them in the storyboard comparing it to the best performance in study or to an international performance of 95%. | Primary: Compliance with hand hygiene based on the 5 moments WHO survey tool. Secondary: Change in hand hygiene compliance according to predictor's variables such as type of HCWs, shifts and hand hygiene situation.                                                                                                                                                              | None                                                                                                                                            | Site coordinators were instructed not to start any intervention beforehand and to report only what asked at each observation period                                                                                                                                                                          | Yes: Generalized estimating equation was used to test the intervention. The first model included a random effect for the health provider and a fixed effect for the intervention. The second model included the last two parameters reported plus the fixed effect corresponding to the time period as recommended by Hussey and Hughes, 2007. |
| Rolsin S; Laurent C; Denis O; Dramaix M; Nonhoff C; Hallin M; Byl B; Struelens MJ. Impact of rapid molecular screening at hospital admission on nosocomial transmission of methicillin-resistant Staphylococcus aureus: cluster randomised trial. PLoS ONE [Electronic Resource]. 9(5):e96310, 2014.                                                                                                                                                                                                                                                                                                                                             | antibiotic resistance | Europe        | Belgium, Erasme Hospital (7 wards)             | Cluster RCT with cross-over                      | No                                                                                                                                                                     | Cluster level    | No  | No              | 7  | Waiver of consent                                                                             | Rapid screening of test for MRSA (vs. enrichment culture using chromogenic agar)                                                                                                                                                                                                                                                                                                                                                                                                                                                                                                                                                                                                                                                                                                                      | Primary: incidence density rate of nosocomial MRSA acquisition per 1000 patient-days. Secondary: time between admission and notification of MRSA positive culture, time between admission of newly detected MRSA carriers and their placement in isolation, the percentage of captured MRSA isolation days, cumulative incidence of nosocomial MRSA acquisition per 100 admissions. | None                                                                                                                                            | One month washout period without intervention                                                                                                                                                                                                                                                                | No                                                                                                                                                                                                                                                                                                                                             |
| Rupp ME; Fitzgerald T; Puamala S; Anderson JR; Craig R; Iwien PC; Jourdan D; Keuchel J; Marion N; Peterson D; Sholtz L; Smith V. Prospective, controlled, cross-over trial of alcohol-based hand gel in critical care units. Infection Control & Hospital Epidemiology. 29(1):8-15, 2008 Jan.                                                                                                                                                                                                                                                                                                                                                    | Hand hygiene          | North America | 2 units at 1 hospital in the USA               | Cluster RCT with cross-over                      | No                                                                                                                                                                     | Individual level | No  | No              | 2  | Unknown                                                                                       | Alcohol based hand gel vs. soap and water                                                                                                                                                                                                                                                                                                                                                                                                                                                                                                                                                                                                                                                                                                                                                             | Primary: 1- Hand hygiene adherence rate, 2- incidence of nosocomial infection, Secondary: contamination of nurses' hands                                                                                                                                                                                                                                                            | None                                                                                                                                            | None                                                                                                                                                                                                                                                                                                         | Yes; "GEE were used to analyze HH adherence rates over time and their relationship to job category and hand gel availability, appropriately accounting for the potential correlation among observations."                                                                                                                                      |
| Septimus EJ; Hayden MK; Kleinman K; Avery TR; Moody J; Weinstein RA; Hickok J; Lankiewicz J; Gombosov A; Haffenreffer K; Kaganov RE; Jernigan JA; Perlin JB; Platt R; Huang SS. Does chlorhexidine bathing in adult intensive care units reduce blood culture contamination? A pragmatic cluster-randomized trial. Infection Control & Hospital Epidemiology. 35 Suppl 3:S17-22, 2014 Oct.                                                                                                                                                                                                                                                       | HAI                   | North America | 43 hospitals with 74 ICUs in the US            | Parallel cluster RCT                             | No                                                                                                                                                                     | Individual level | No  | No              | 43 | Unknown                                                                                       | 1. MRSA Screening and isolation 2. Plus Targeted decolonization of MRSA carriers, 3. No screening with universal decolonization of all patients with mupirocin and CHG bathing                                                                                                                                                                                                                                                                                                                                                                                                                                                                                                                                                                                                                        | Primary: rates of blood contamination                                                                                                                                                                                                                                                                                                                                               | None                                                                                                                                            | Design included around a 4-month period to phase in the intervention, all ICUs from one hospital had the same intervention                                                                                                                                                                                   | Yes: generalized linear mixed models to account for the cluster-randomized design of the trial                                                                                                                                                                                                                                                 |

|                                                                                                                                                                                                                                                                                                                                                                                                                      |              |               |                                                                            |                                |                                                                                                                                                                                 |                  |     |    |    |                                                                           |                                                                                                                                                                                                                                                                                                                                                                                                                                       |                                                                                                                                                                                                                                                                                                                                                                                                             |                                                                                  |                                                                                                                                                                                                                                                                                   |                                                                                                                                                                                                                                  |
|----------------------------------------------------------------------------------------------------------------------------------------------------------------------------------------------------------------------------------------------------------------------------------------------------------------------------------------------------------------------------------------------------------------------|--------------|---------------|----------------------------------------------------------------------------|--------------------------------|---------------------------------------------------------------------------------------------------------------------------------------------------------------------------------|------------------|-----|----|----|---------------------------------------------------------------------------|---------------------------------------------------------------------------------------------------------------------------------------------------------------------------------------------------------------------------------------------------------------------------------------------------------------------------------------------------------------------------------------------------------------------------------------|-------------------------------------------------------------------------------------------------------------------------------------------------------------------------------------------------------------------------------------------------------------------------------------------------------------------------------------------------------------------------------------------------------------|----------------------------------------------------------------------------------|-----------------------------------------------------------------------------------------------------------------------------------------------------------------------------------------------------------------------------------------------------------------------------------|----------------------------------------------------------------------------------------------------------------------------------------------------------------------------------------------------------------------------------|
| Speroff T; Ely EW; Greevy R; Weinger MB; Talbot TR; Wall R; Deshpande JK; France DJ; Nwosu S; Burgess H; Englebright J; Williams MV; Dittus RS. Quality improvement projects targeting health care-associated infections: comparing Virtual Collaborative and Toolkit approaches. <i>Journal of Hospital Medicine</i> (Online). 6(5):271-8, 2011 May.                                                                | HAI          | North America | 60 hospitals in the US                                                     | Parallel cluster RCT           | Yes; "To minimize contamination bias between study groups within the same facility, the unit of randomization was the hospital and implementation was at the level of the ICU." | Individual level | No  | No | 60 | By hospital leadership                                                    | Virtual collaborative vs toolkit only                                                                                                                                                                                                                                                                                                                                                                                                 | CLABSI and VAP rates                                                                                                                                                                                                                                                                                                                                                                                        | Hospitals matched on geographic location and ICU volume                          | None                                                                                                                                                                                                                                                                              | Yes; "...and account for clustering of ICUs within hospitals and adjusting for baseline covariates."                                                                                                                             |
| Stevenson KB, K Searle, G Curry, et al. Infection control interventions in small rural hospitals with limited resources: results of a cluster-randomized feasibility trial. <i>Antimicrob Resist Infect Control</i> 2014;3:10.                                                                                                                                                                                       | HAI          | North America | 10 rural community hospitals in 2 US states                                | Parallel cluster RCT           | Yes                                                                                                                                                                             | Individual level | No  | No | 10 | Patient consent required for surveillance cultures                        | Individualized campaigns to promote hand hygiene, isolation compliance and outbreak control vs. current infection control practice                                                                                                                                                                                                                                                                                                    | Primary: Hand hygiene compliance; Also measured patient colonization with MRSA and VRE                                                                                                                                                                                                                                                                                                                      | None                                                                             | Implemented the study in areas where clusters are distinct and well separated; "The selected hospitals were separated by significant geographical distances in both states."                                                                                                      | Yes; "...analyzed using mixed effects logistic regression to model the probability of compliance. These models account for the lack of independence introduced by the individual HH opportunities being nested within hospital." |
| Var C; Bazzano AN; Srivastav SK; Welby JC; Ek N; Oberhelman RA. Newborn Infection Control and Care Initiative for health facilities to accelerate reduction of newborn mortality (NICCI): study protocol for a randomized controlled trial. <i>Trials</i> [Electronic Resource]. 16:257, 2015 Jun 05.                                                                                                                | HAI          | Asia          | 16 health-centers in Takeo, Cambodia                                       | Cluster RCT with stepped-wedge | Yes                                                                                                                                                                             | Individual level | No  | No | 16 | Individual patient consent                                                | 1. The Newborn Infection Control and Care Initiative: community and health facility linked intervention to improve health outcomes for newborns addressing infection control in the perinatal period in health facilities, promoting infection prevention and control practices in health center and home environments, and improving timeliness of referrals of newborns with suspected infections to appropriate health facilities. | Primary: percentage of mothers who know at least three danger signs, percentage of volunteers who know six danger signs, percent of families who seek care from an appropriate facility, decreased time between onset of suspected danger signs and referral to appropriate facility, proportion of hand washing at key events by families, proportion of hand washing at key points by health center staff | None                                                                             | None                                                                                                                                                                                                                                                                              | Yes: Analysis performed accounting for potential within-cluster correlation using random effect model, multilevel model or GEE                                                                                                   |
| Wilson AP; Smyth D; Moore G; Singleton J; Jackson R; Gant V; Jeanes A; Shaw S; James E; Cooper B; Kafatos G; Cookson B; Singer M; Bellingan G. The impact of enhanced cleaning within the intensive care unit on contamination of the near-patient environment with hospital pathogens: a randomized crossover study in critical care units in two hospitals. <i>Critical Care Medicine</i> . 39(4):651-8, 2011 Apr. | Environment  | Europe        | 2 hospitals in the UK                                                      | Cluster RCT with crossover     | Yes; "To avoid seasonal bias..."                                                                                                                                                | Individual level | Yes | No | 2  | Waived consent                                                            | Enhanced cleaning of the near-patient environment                                                                                                                                                                                                                                                                                                                                                                                     | Primary: Environmental contamination from 5 sites and patient hands; Secondary: new patient acquisition of MRSA                                                                                                                                                                                                                                                                                             | None                                                                             | Multiple cross-over periods "Each hospital had 3 cleaning phases of each type". One week wash-out period between each phase to minimize residual effects of the copper biocide in the microfiber cloth; and to "avoid seasonal bias, the study was divided into six 8-week blocks | Yes: "A mixed logistic regression model was fitted with the bed areas defined as a random-effect term."                                                                                                                          |
| Yeung WK, WSW Tam, TW Wong. Clustered randomized controlled trial of a hand hygiene intervention involving pocket-sized containers of alcohol-based hand rub for the control of infections in long-term care facilities. <i>Infect Control Hospital Epidemiol</i> 2011;32:67-76.                                                                                                                                     | Hand hygiene | Asia          | 7 community-based, private, or semi-private, residential LTCF in Hong Kong | Stratified cluster RCT         | No                                                                                                                                                                              | Individual level | No  | No | 7  | Consent was collected from the LTCFs and the residents or their guardians | Multifaceted hand hygiene intervention: Pocket-sized containers of alcohol-based gel, reminder materials, and HCW education                                                                                                                                                                                                                                                                                                           | Primary: HCW Hand hygiene compliance; Secondary: rates of infection requiring hospitalization, outbreaks and isolated cases of influenza, norovirus infection                                                                                                                                                                                                                                               | LTCF were stratified by nursing staffing levels and level of resident disability | There were no observation recorded while the intervention was being implemented.                                                                                                                                                                                                  | No                                                                                                                                                                                                                               |
